# Supplementary material for: Visualization and bibliometric analysis of cAMP signaling system research trends and hotspots in cancer
Source: PubMed Central journal article supplement (PMC7738981; doi:10.7150/jca.47158), 2021-01-01
Supplement: jcav12p0358s1.pdf [file jcav12p0358s1.pdf]

## Supplementary Material

### **Visualization and bibliometric analysis of cAMP signaling system research trends and hotspots in cancer**

Caoli Tang<sup>1</sup>, Duanya Liu<sup>1</sup>, Yongsheng Fan<sup>1</sup>, Jun Yu<sup>1</sup>, Cong Li<sup>1</sup>, Jianmei Su<sup>1\*</sup> and Chunhong Wang<sup>1\*</sup>

<sup>1</sup>Department of Preventive Medicine, School of Public Health, Wuhan University, Donghu Road 115, Wuhan 430071, Hubei, China

<sup>2</sup>Key Laboratory of Regional Development and Environmental Response, Faculty of Resources and Environmental Science, Hubei University, Friendship Avenue 368, Wuhan 430062, Hubei, China

\* Corresponding author at: Department of Preventive Medicine, School of Public Health, Wuhan University, Donghu Road 115, Wuhan 430071, Hubei, China

*E-mail address:* [sujianmei@whu.edu.cn](mailto:sujianmei@whu.edu.cn) (J. Su); [wchunhong027@whu.edu.cn](mailto:wchunhong027@whu.edu.cn) (C. Wang)

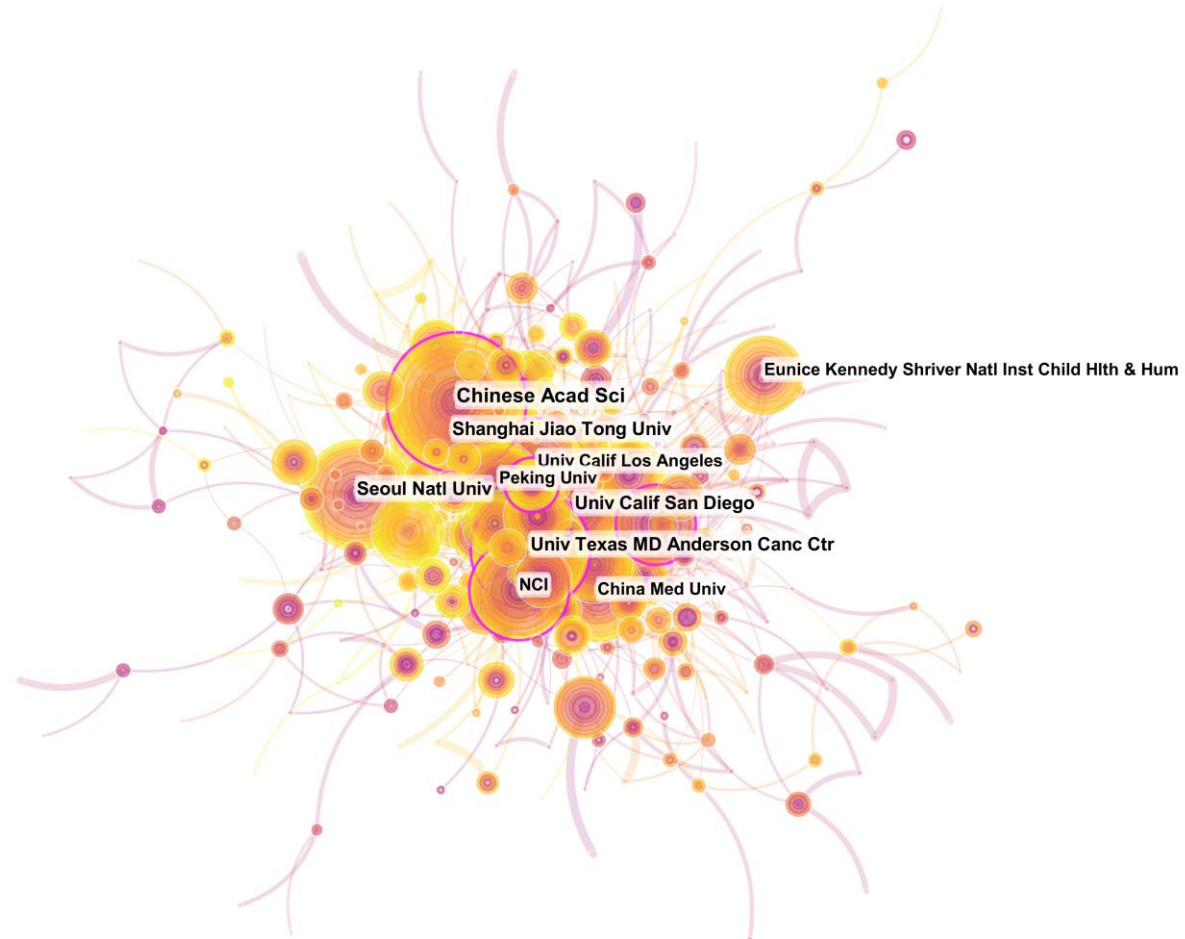

**Fig S1.** Collaboration network map of institutions for cAMP signaling system research in the cancer field from 2009 to 2019.

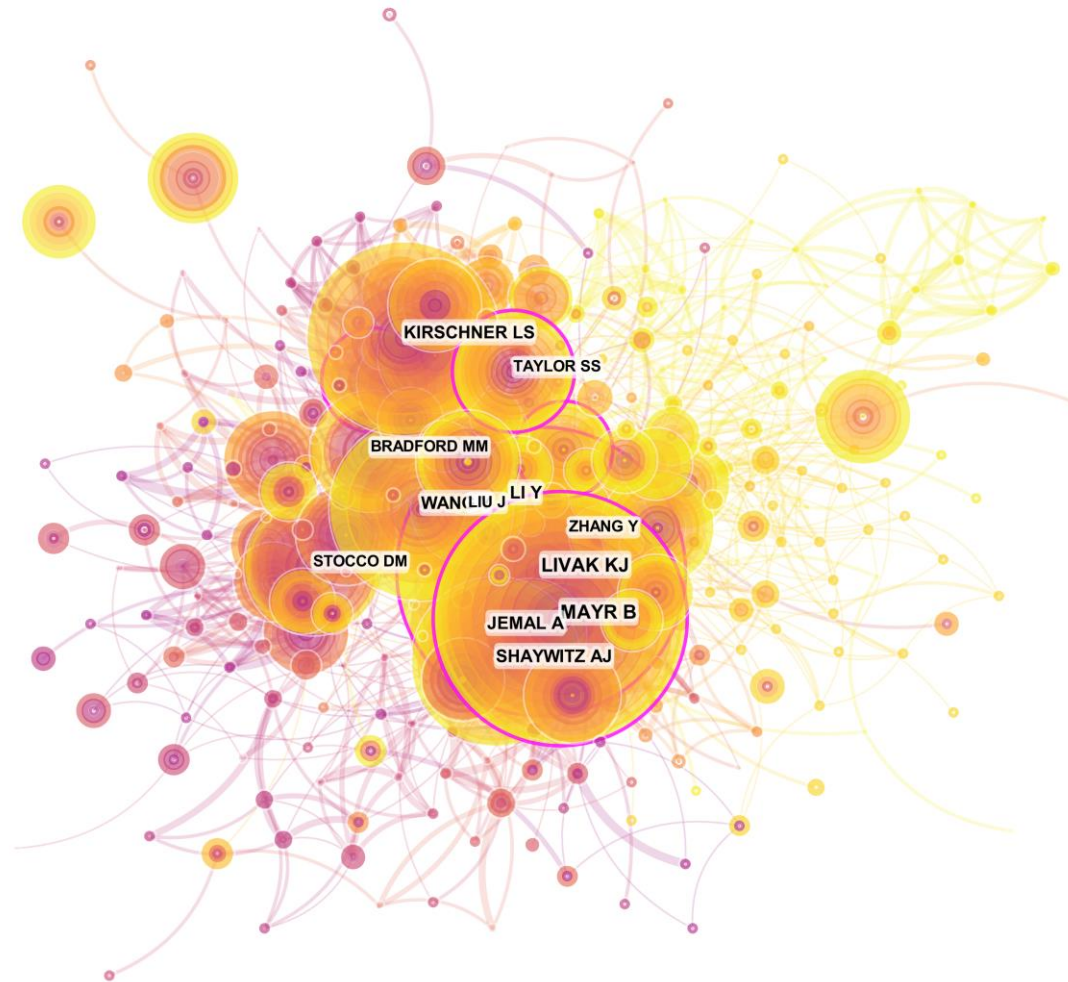

**Fig S2.** Author co-citation network map for cAMP signaling system research in the cancer field from 2009 to 2019.

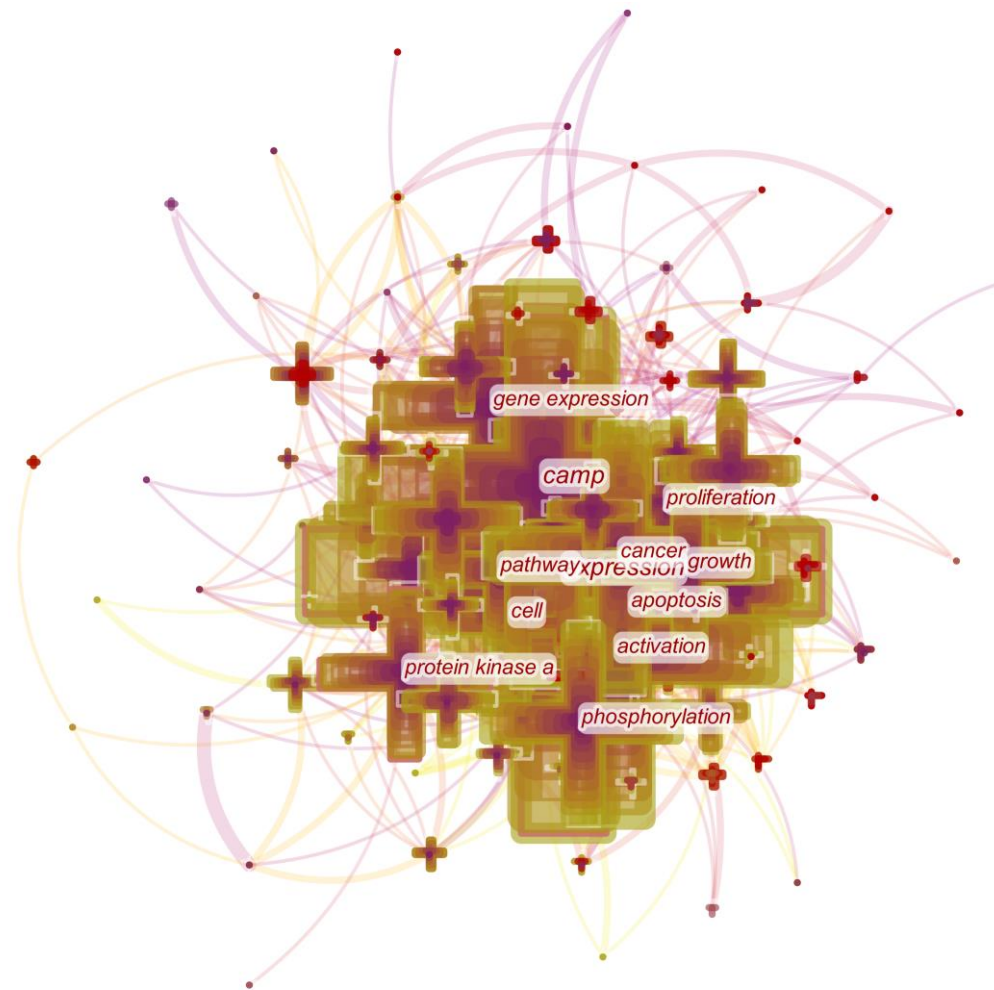

**Fig S3.** Visualization of keywords from the publications of cAMP signaling system in cancer field from 2009 to 2019.

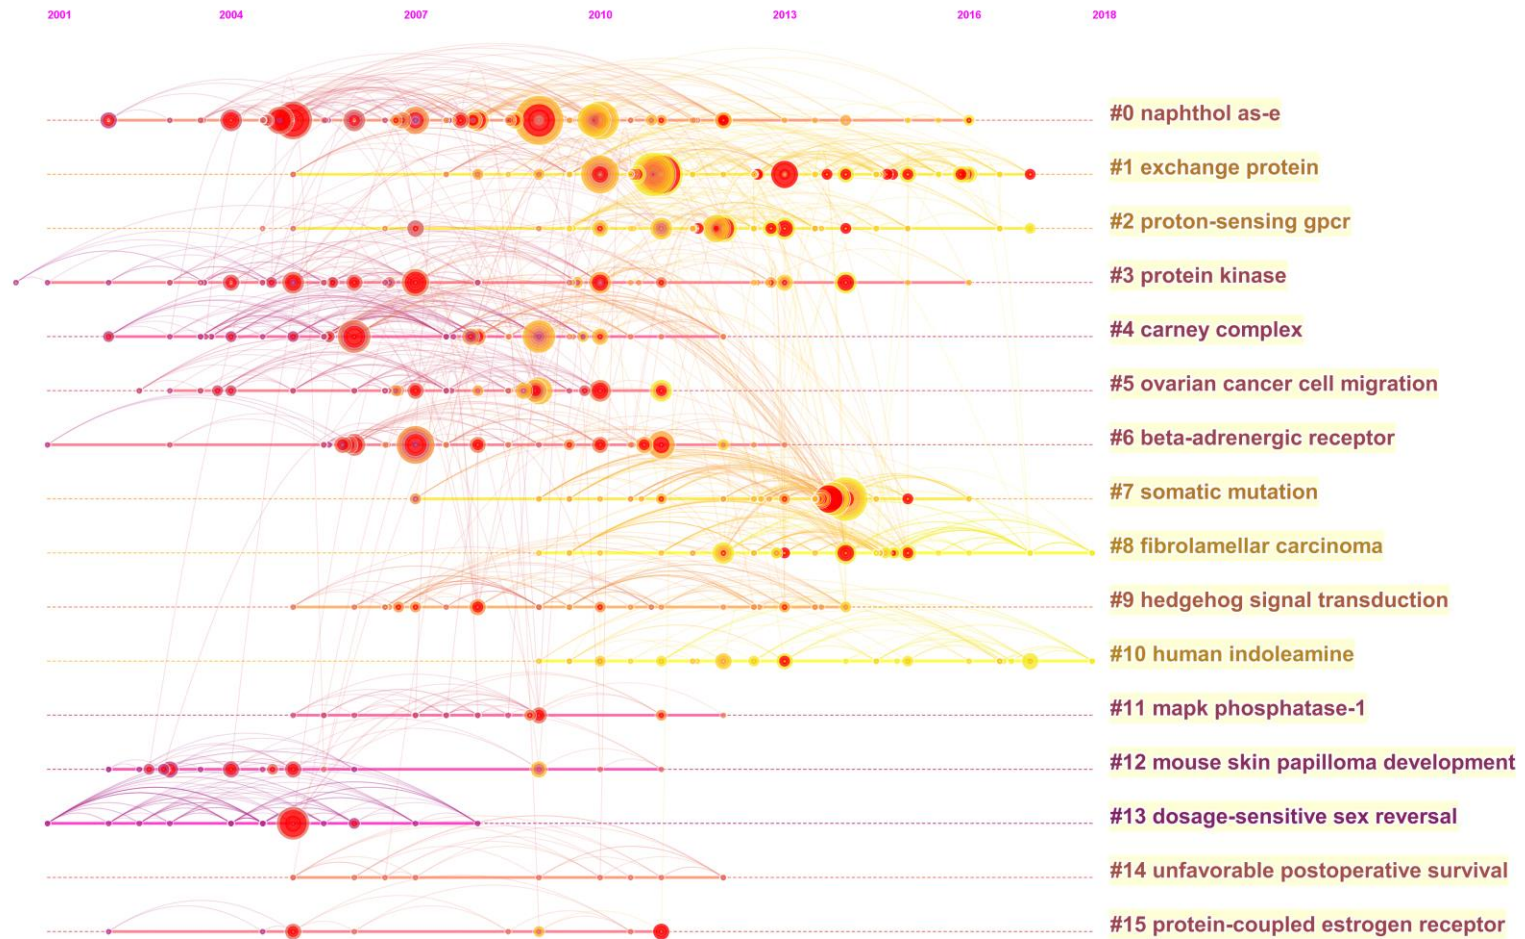

**Fig S4.** The timeline view of references from publications related to the research of cAMP signaling system in cancer field.

**Table S1.** Top 10 co-cited references about the research of cAMP signaling system in cancer field from 2009 to 2019

| Rank | Citation | Co-cited Reference                                  | Main Contents                                                                                                                                                                                           | Cluster ID |
|------|----------|-----------------------------------------------------|---------------------------------------------------------------------------------------------------------------------------------------------------------------------------------------------------------|------------|
| 1    | 45       | Hanahan D, 2011, CELL, V144, P646                   | An introduction to the original and new hallmarks of cancers, with expanding upon the functional roles and contributions made by recruited stromal cells to tumor biology.                              | 1          |
| 2    | 44       | Beuschlein F, 2014, NEW ENGL J MED, V370, P1019     | The genetic variation of PRKACA, the main catalytic subunit of PKA, is related to the occurrence of adrenal hyperplasia and adrenal tumor.                                                              | 7          |
| 3    | 43       | Sakamoto KM, 2009, CLIN CANCER RES, V15, P2583      | An introduction that CREB can play in both hematologic and nonhematologic malignancies, and it may be a target for rational therapy.                                                                    | 0          |
| 4    | 35       | Zhang XM, 2005, P NATL ACAD SCI USA, V102, P4459    | CREB phosphorylation alone is not a reliable predictor of target gene activation and additional CREB regulatory partners are required for recruitment of the transcriptional apparatus to the promoter. | 0          |
| 5    | 33       | Altarejos JY, 2011, NAT REV MOL CELL BIO, V12, P141 | Review the research progress of CREB and cAMP-regulated transcriptional co-activators (CRTC) in signal transduction and transcription.                                                                  | 1          |
| 6    | 33       | Wen AY, 2010, I IMMUNOL, V185, P6413                | An introduction to the role of the transcription factor CREB in immune function.                                                                                                                        | 0          |
| 7    | 31       | Gloerich M, 2010, ANNU REV PHARMACOL, V50, P355     | Review the activation mechanism and biological functions of Epac.                                                                                                                                       | 1          |
| 8    | 29       | Sugimoto Y, 2007, J BIOL CHEM, V282, P11613         | An introduction to the biochemical properties of PGE receptor subtypes and physiological functions of EP subtypes.                                                                                      | 6          |
| 9    | 29       | Bertherat J, 2009, J CLIN ENDOCR METAB, V94, P2085  | Compared with those without PRKAR1A mutation, some tumors such as myxomas, lentigines, and schwannomas are more frequently and earlier in carney complex patients with PRKAR1A mutation.                | 4          |
| 10   | 28       | Horvath A, 2006, NAT GENET, V38, P794               | Identify mutations in the gene encoding phosphodiesterase 11A4 (PDE11A) in individuals with adrenocortical hyperplasia that was not caused by known defects.                                            | 4          |

**Table S2.** Top 10 references from 120 bursts items

| Rank | Strength | References                                       | Begin | End  | Cluster |
|------|----------|--------------------------------------------------|-------|------|---------|
| 1    | 9.917    | Jemal A, 2011, CA-CANCER J CLIN, V61, P69        | 2014  | 2016 | 6       |
| 2    | 9.252    | Beuschlein F, 2014, NEW ENGL J MED, V370, P1019  | 2014  | 2016 | 7       |
| 3    | 8.870    | Zhang XM, 2005, P NATL ACAD SCI USA, V102, P4459 | 2009  | 2013 | 0       |
| 4    | 7.965    | Conti M, 2007, ANNU REV BIOCHEM, V76, P481       | 2010  | 2014 | 3       |
| 5    | 7.700    | Stork PJS, 2002, TRENDS CELL BIOL, V12, P258     | 2009  | 2010 | 40      |
| 6    | 7.686    | Torre LA, 2015, CA-CANCER J CLIN, V65, P87       | 2017  | 2019 | 115     |
| 7    | 7.184    | Conkright MD, 2003, MOL CELL, V12, P413          | 2009  | 2010 | 0       |
| 8    | 7.184    | Enserink JM, 2002, NAT CELL BIOL, V4, P901       | 2009  | 2010 | 12      |
| 9    | 6.970    | Thaker PH, 2006, NAT MED, V12, P939              | 2011  | 2013 | 6       |
| 10   | 6.922    | Horvath A, 2006, NAT GENET, V38, P794            | 2009  | 2012 | 4       |
